# Supplementary material for: Post-meiotic mechanism of facultative parthenogenesis in gonochoristic whiptail lizard species
Source: eLife. 2024 Jun 7;13:e97035. doi: 10.7554/eLife.97035 (PMC11161175; doi:10.7554/eLife.97035)
Supplement: Figure 5—source data 1. [file elife-97035-fig5-data1.xlsx]

## Sheet: Dataset S1.
Figure 5-source data 1. Source data of Figure 5
							Percent of bases at average coverage			Percent of bases for all positions
ID	Species	Average coverage	Total stacks	Total bases	Number of stacks at average coverage	Number of bases at average coverage	Heterozygous	Homozygous	Unknown	Heterozygous	Homozygous	Unknown
AER008	angusticeps	47.84	42708	4026297	454	42708	0.156879	99.6816	0.161562	0.178129	99.2437	0.578174
AER010	angusticeps	52.82	42381	3988736	426	40082	0.222045	99.5784	0.199591	0.189634	99.5189	0.291421
AER012	angusticeps	63.52	43732	4116525	303	28506	0.17891	99.6352	0.185926	0.180856	99.5105	0.308634
AER022	angusticeps	36.43	39661	3975332	320	32024	0.193605	99.6409	0.165501	0.175608	99.2852	0.5392
AER042	angusticeps	32.97	43516	4096015	521	49005	0.112233	99.7735	0.114274	0.132397	99.5147	0.352928
AER043	angusticeps	44.62	42442	4003491	724	68099	0.173277	99.6799	0.146845	0.179194	99.1996	0.621183
JEGE362	angusticeps	41.35	36436	3430532	269	25295	0.0276735	99.913	0.0593003	0.064713	99.6029	0.332339
LACM134404	angusticeps	61.46	40618	3867401	523	49712	0.0704055	99.819	0.110637	0.0843978	99.4394	0.47616
LDOR057	angusticeps	28.39	39409	3710822	763	71814	0.20191	99.5279	0.270142	0.184514	99.3991	0.416377
NLMM380	angusticeps	61.13	52680	4966326	481	45255	0.154679	99.6531	0.192244	0.186355	99.2117	0.601974
NLMM384	angusticeps	69.99	43466	4091476	344	32360	0.12979	99.7033	0.166873	0.166004	99.5286	0.305367
NLMM391	angusticeps	142.34	45157	4529824	216	21627	0.18033	99.5469	0.272807	0.185084	99.1793	0.635654
NLMM480	angusticeps	50.03	45259	4265725	301	28311	0.211932	99.6538	0.134223	0.175609	99.2617	0.562648
SFDG120	angusticeps	43	43241	4075315	629	59167	0.211266	99.6518	0.136901	0.200426	99.2508	0.548743
SFDG121	angusticeps	63.33	37544	3761029	225	22526	0.239723	99.5428	0.217526	0.208241	99.4153	0.376493
SFDG162	angusticeps	62.11	43813	4124692	434	40834	0.198364	99.6008	0.200813	0.190923	99.4707	0.338377
SFDG164	angusticeps	116.53	60045	6027424	91	9117	0.120654	99.5174	0.361961	0.207153	98.9522	0.840608
SFDG179	angusticeps	43.15	41221	3883618	209	19673	0.259239	99.4358	0.304987	0.197676	99.2836	0.518692
ANMO4948	arizonae	98.22	55140	4980038	293	26399	0.204553	99.5833	0.212129	0.229396	99.0255	0.745075
ANMO4920	arizonae	59.3	43585	3930465	542	48847	0.241571	99.4513	0.307081	0.232873	99.3345	0.432595
ANMO4921	arizonae	66.94	44028	3970079	437	39381	0.238694	99.4744	0.28694	0.223547	99.3661	0.410319
ANMO4922	arizonae	71.46	45532	4108278	228	20536	0.248344	99.5861	0.165563	0.250178	99.2082	0.541589
UTEP21734	arizonae	44.46	43385	3915156	586	52836	0.289575	99.3205	0.389886	0.230974	99.2242	0.54478
MVZ252646	arizonae	26.42	41076	3705915	820	73999	0.282436	99.127	0.590549	0.261555	99.0625	0.675919
AMNH113450	arizonae	45.08	41922	3780464	217	19537	0.245688	99.6468	0.107488	0.265206	99.2542	0.480629
OCGR6219	arizonae	48.02	37925	3419897	537	48396	0.301678	99.3966	0.301678	0.243458	99.3257	0.430832
OCGR6220	arizonae	70.86	43484	3924160	456	41101	0.228705	99.4574	0.313861	0.256157	99.139	0.604843
OCGR6228	arizonae	51.87	39487	3562154	500	45089	0.252833	99.3391	0.408082	0.240304	99.2395	0.520191
OCGR6229	arizonae	44.72	40298	3634251	679	61170	0.256662	99.5292	0.214157	0.243324	99.2933	0.463342
OCGR6230	arizonae	49.74	42834	3865306	584	52673	0.252501	99.2729	0.474626	0.242646	99.1313	0.626057
RCT940	arizonae	146.68	50823	4589981	251	22626	0.318218	99.3591	0.322638	0.27133	98.987	0.741659
AMNH113884	arizonae	132.48	3021	272392	5	450	0.444444	99.5556	0	0.106097	99.4457	0.448251
ANMO4923	arizonae	33.09	31119	2803859	299	26940	0.259837	99.4692	0.270973	0.191343	99.4846	0.324089
ANMO4155	burti	21.03	34668	3124286	634	57147	0.262481	99.3928	0.344725	0.235446	99.3288	0.43578
ANMO3767	burti	26.2	33443	3013624	536	48286	0.16775	99.6189	0.213312	0.155195	99.4754	0.369422
AQM2	burti	20.05	35269	3177710	728	65576	0.155545	99.6508	0.193668	0.141076	99.4532	0.405701
ANMO4105	burti	26.53	36379	3278895	322	29018	0.34806	99.3383	0.313598	0.329837	99.2044	0.465767
ANMO4109	burti	27.04	40549	3657107	924	83306	0.428541	99.1573	0.414136	0.345984	99.1124	0.541576
ANMO4110	burti	38.11	38760	3494526	291	26227	0.461357	99.2107	0.327906	0.355785	99.1957	0.44853
ANMO4118	burti	85.84	42320	3820544	416	37505	0.431942	99.1894	0.378616	0.363378	98.9953	0.641322
OCGR6243	burti	28.25	36763	3313637	740	66660	0.289529	99.5125	0.19802	0.23008	99.3835	0.386464
OCGR8439	burti	55.38	41352	3729826	509	45888	0.259327	99.3898	0.350854	0.233952	99.2892	0.476859
ANMO4396	costatus	46.58	49182	4435311	651	58643	0.240438	99.5737	0.18587	0.232994	99.3146	0.45237
ANMO4397	costatus	111.14	59545	5376785	189	17031	0.152663	99.5596	0.287711	0.258593	99.0375	0.703878
ANMO4459	costatus	26.54	42952	3872313	740	66719	0.416673	99.1607	0.422668	0.303488	99.215	0.481547
ANMO4460	costatus	73.5	54519	4921488	323	29135	0.302042	99.2243	0.473657	0.318095	98.9517	0.730165
ANMO4466	costatus	56.49	53471	4824829	389	35054	0.35374	99.3553	0.29098	0.266517	99.1268	0.606654
OHG22	costatus	39.97	44952	4054287	669	60322	0.457545	99.128	0.414442	0.306071	99.2054	0.488569
ANMO2165	costatus	45.51	43552	3928802	656	59108	0.329905	99.4112	0.258848	0.258934	99.2281	0.512955
ANMO4482	costatus	77.79	53312	4811648	365	32887	0.206769	99.5378	0.25542	0.232394	99.1798	0.587844
ANMO4507	costatus	66.99	47742	4309466	303	27316	0.30019	99.2971	0.402694	0.322035	99.0865	0.591489
ANMO2083	costatus	29.16	53772	4854511	826	74591	0.443753	98.8216	0.734673	0.35878	98.7985	0.842701
ANMO2915	costatus	44.41	43376	3912529	534	48174	0.448375	99.0451	0.506497	0.322272	99.1698	0.507958
ANMO2916	costatus	61.58	44646	4028429	399	36017	0.577505	98.7839	0.638587	0.311213	99.134	0.554832
ANMO3057	costatus	65.68	43153	3893501	369	33275	0.381668	99.2036	0.414726	0.315038	99.1433	0.541646
ANMO3058	costatus	64.12	43052	3883535	270	24335	0.493117	99.1864	0.320526	0.321434	99.1696	0.508944
ANMO3263	costatus	39.16	41438	3736250	362	32637	0.545393	99.0685	0.386065	0.308545	99.2296	0.461827
ANMO4029	costatus	37.98	43716	3942497	504	45477	0.481562	98.9665	0.551927	0.323348	99.1658	0.510869
ANMO4399	costatus	84.98	48757	4402206	365	32881	0.298044	99.5043	0.197683	0.308005	99.0703	0.621688
ANMO4461	costatus	20.21	31892	2874584	693	62460	0.308998	99.3292	0.361832	0.297121	99.2601	0.442742
ANMO4494	costatus	30.89	46949	4234948	888	80102	0.403236	99.0774	0.519338	0.31488	99.134	0.551081
ANMO4500	costatus	63.18	52134	4705285	382	34441	0.336808	99.2973	0.365843	0.333094	99.013	0.653946
ANMO4501	costatus	52.3	48444	4371043	515	46424	0.400655	99.2396	0.359728	0.323927	99.0932	0.582859
ANMO4502	costatus	33.41	46623	4205434	816	73552	0.432347	99.2019	0.365728	0.314831	99.1497	0.535474
ANMO4505	costatus	58.96	49598	4475228	431	38850	0.355212	99.2999	0.344916	0.270847	99.147	0.582116
ANMO4513	costatus	63.75	47678	4305382	328	29569	0.328046	99.2797	0.392303	0.30506	99.043	0.651951
ANMO4514	costatus	46.83	49688	4483320	507	45738	0.327955	99.1582	0.513796	0.31035	99.0719	0.617734
IDF76	costatus	22.36	42000	3785450	971	87481	0.410375	99.3176	0.272059	0.297375	99.2497	0.452945
LACM130	costatus	34.06	45925	4141538	933	84108	0.424454	99.1939	0.381652	0.31539	99.2124	0.47224
ANMO4536	deppii	81.76	47584	4296819	388	34975	0.345961	99.3052	0.348821	0.252093	99.0136	0.734334
ANMO4537	deppii	103.09	44447	4010809	192	17288	0.323924	99.5662	0.109903	0.248778	99.195	0.556272
ANMO4587	deppii	90.41	47529	4293203	298	26872	0.375856	99.2036	0.420512	0.314241	98.8571	0.828659
ANMO1011	deppii	49.1	41488	3742999	508	45765	0.233803	99.5521	0.214137	0.201363	99.3021	0.496554
ANMO1824	deppii	34.04	32287	2911947	557	50195	0.0796892	99.6534	0.266959	0.0912791	99.4447	0.463985
ANMO2203	deppii	23.55	32114	2893224	555	49999	0.108002	99.686	0.206004	0.111778	99.6199	0.268351
ANMO2210	deppii	25.03	41176	3712955	842	75872	0.159479	99.5716	0.268874	0.150258	99.3042	0.545522
ANMO2490	deppii	39.82	38923	3510030	576	51918	0.294695	99.3779	0.327439	0.241907	99.327	0.431107
ANMO2493	deppii	33.38	38289	3453205	560	50495	0.376275	99.1999	0.423804	0.276844	99.2369	0.486215
ANMO2584	deppii	25.87	38716	3492705	996	89737	0.180528	99.5754	0.244046	0.170212	99.3345	0.495318
ANMO2686	deppii	30.85	37712	3398897	680	61257	0.186101	99.6066	0.207323	0.176646	99.4649	0.35841
ANMO2808	deppii	50.17	37353	3368252	499	44961	0.126777	99.6464	0.226863	0.142656	99.4605	0.396853
ANMO2827	deppii	25.99	38387	3462622	1142	102939	0.250634	99.4045	0.344864	0.224627	99.2861	0.489254
ANMO2904	deppii	33.42	39905	3597849	739	66574	0.235828	99.5524	0.211794	0.191114	99.3804	0.428506
ANMO3353	deppii	26.82	35369	3189190	597	53811	0.161677	99.4834	0.354946	0.159131	99.3507	0.490187
ANMO3456	deppii	31.87	36192	3264926	525	47367	0.278675	99.1978	0.523571	0.191337	99.2334	0.575296
ANMO3457	deppii	37.63	46299	4178483	592	53380	0.207943	99.3968	0.395279	0.205362	99.1505	0.644181
ANMO4414	deppii	74.19	54189	4890483	297	26772	0.0933811	99.6115	0.295084	0.120213	99.2642	0.615583
ANMO4415	deppii	132.21	50155	4527346	209	18850	0.106101	99.4589	0.435013	0.154395	99.2384	0.607221
ANMO4431	deppii	43.93	40071	3613668	601	54202	0.206634	99.3506	0.442788	0.205221	99.3381	0.45671
ANMO4435	deppii	56.62	43756	3947787	461	41543	0.163686	99.5691	0.267193	0.193982	99.2663	0.53972
ANMO4441	deppii	46.97	42122	3799037	593	53419	0.106704	99.7136	0.179711	0.154329	99.3599	0.485755
ANMO4532	deppii	22.48	35471	3196920	779	70201	0.23219	99.4886	0.279198	0.207669	99.3595	0.432854
ANMO4534	deppii	55.52	43244	3903448	428	38656	0.219888	99.0403	0.739859	0.23738	99.0951	0.667564
ANMO4541	deppii	70.24	43423	3918198	447	40271	0.293015	99.5058	0.201137	0.2616	99.1795	0.55893
ANMO4543	deppii	83.56	44658	4032262	337	30395	0.263201	99.2532	0.483632	0.276793	99.0019	0.721332
ANMO4544	deppii	63.28	43998	3971256	420	37856	0.253593	99.4347	0.311708	0.270217	99.0837	0.646042
ANMO4580	deppii	30.46	39724	3581201	767	69109	0.397922	99.3286	0.273481	0.290098	99.28	0.429884
ANMO4586	deppii	61.98	46772	4220597	287	25893	0.293516	99.189	0.517514	0.274653	99.1463	0.579065
ANMO4590	deppii	67.55	45325	4093287	395	35626	0.34806	99.2253	0.426655	0.307968	98.9307	0.761295
ANMO4635	deppii	42.65	46296	4175439	684	61603	0.196419	99.6429	0.160706	0.161085	99.3522	0.486703
ANMO721	deppii	24.59	39444	3559355	901	81270	0.127969	99.3995	0.472499	0.160085	99.1626	0.677286
ANMO870	deppii	54.79	41159	3714859	557	50223	0.221014	99.3788	0.400215	0.208514	99.1726	0.618866
ANMO887	deppii	45.55	47278	4269602	609	54957	0.232909	99.2267	0.540423	0.222082	98.9793	0.798622
ANMO4566	deppii	51.06	42455	3830083	595	53658	0.294457	99.2844	0.421186	0.292579	99.183	0.524427
IDF199	deppii	75.77	41870	3781485	349	31467	0.158897	99.4788	0.362284	0.142616	99.2047	0.652733
LACM124	deppii	57.31	43482	3921393	345	31099	0.205794	99.4469	0.347278	0.194956	99.3315	0.473505
LDOR30	deppii	46.6	34488	3109703	511	46045	0.00217179	99.7654	0.232381	0.0283307	99.6092	0.362446
LMOO102	deppii	65.1	48542	4386016	444	40036	0.147367	99.4655	0.387152	0.132124	99.1249	0.742952
LMOO92	deppii	66.97	46256	4179418	414	37343	0.131216	99.4243	0.444528	0.136933	99.1119	0.751133
LNG428	deppii	27.93	38152	3439053	534	48105	0.417836	99.3431	0.23906	0.301944	99.2401	0.457946
MVZ204070	deppii	22.36	33589	3027554	578	52092	0.195807	99.4913	0.312908	0.167957	99.4396	0.392462
UOGV1015	deppii	77.04	45823	4135195	280	25234	0.126813	99.572	0.301181	0.15697	99.2397	0.603285
UOGV1019	deppii	44.81	42712	3852187	592	53298	0.114451	99.8011	0.0844309	0.130497	99.3942	0.47534
UOGV1091	deppii	26.97	37045	3339028	595	53596	0.192179	99.6082	0.199642	0.145162	99.4596	0.395235
UOGV181	deppii	36.51	45437	4099663	520	46883	0.268754	99.3452	0.386067	0.208749	99.2472	0.54402
UOGV837	deppii	57.82	40944	3693286	629	56686	0.215221	99.5166	0.268144	0.210625	99.3243	0.46506
ANMO2812	deppii	36.19	33438	3015198	225	20277	0.143019	99.566	0.29097	0.102713	99.4922	0.405048
ANMO3137	deppii	30.1	38688	3492252	806	72669	0.0288982	99.5693	0.401822	0.0792612	99.2071	0.713608
ANMO3138	deppii	23.16	34242	3086595	901	81130	0.027117	99.8669	0.106003	0.038813	99.6247	0.336487
ANMO4401	deppii	82.96	53299	4811678	270	24342	0.0369731	99.6221	0.340974	0.0737165	99.2238	0.702458
UOGV893a	deppii	76.37	47188	4262207	360	32480	0.221675	99.2611	0.517241	0.227347	98.9369	0.835764
ANMO1485	gularis	20.5	38828	3500933	978	88128	0.256445	99.4349	0.308642	0.242678	99.2238	0.533515
ANMO1498	gularis	28.14	38629	3483252	851	76727	0.318011	99.2975	0.38448	0.257547	99.2571	0.485351
ANMO1502	gularis	28.16	41447	3738348	959	86470	0.308778	99.2795	0.411703	0.262817	99.2031	0.534113
ANMO4906	gularis	76.6	45397	4095637	285	25733	0.338087	98.9974	0.664516	0.282667	99.1976	0.519748
ANMO4907	gularis	76.28	44677	4030901	371	33428	0.344023	99.4077	0.248295	0.304076	99.1638	0.532164
CPA016	gularis	58.19	47776	4311891	446	40215	0.340669	99.2664	0.392888	0.311348	99.0667	0.622001
CPA017	gularis	40.77	42353	3819743	768	69204	0.359806	99.3526	0.287556	0.303109	99.2173	0.479587
CPA025	gularis	45.18	46816	4228032	521	47023	0.346639	99.0792	0.574187	0.298106	98.9137	0.788144
DMA038	gularis	50	48517	4379607	588	53016	0.307454	99.3228	0.3697	0.25806	99.067	0.674924
OCGR4942	gularis	57.46	48343	4361594	490	44160	0.321558	99.3818	0.296649	0.239339	99.1951	0.56555
OCGR4943	gularis	92.78	48123	4344958	227	20499	0.253671	99.039	0.707352	0.256642	99.005	0.738373
UADZ9725	gularis	26.65	40633	3663324	742	66842	0.380001	99.3926	0.227402	0.276907	99.2462	0.476889
UADZ9726	gularis	33.72	41505	3742839	625	56309	0.307233	99.4406	0.25218	0.27212	99.2441	0.48375
UADZ9729	gularis	42.04	44057	3976427	577	51986	0.332782	99.421	0.24622	0.282766	99.1277	0.589549
UADZ9737	gularis	41.03	44220	3989428	692	62381	0.335038	99.285	0.379923	0.280817	99.1878	0.53143
UTEP20329	gularis	36.02	43009	3880701	553	49828	0.232801	99.5224	0.244842	0.220939	99.229	0.550081
UTEP20688	gularis	96.52	44951	4056421	250	22527	0.266347	99.4673	0.266347	0.265998	99.1766	0.557413
UTEP20726	gularis	32.7	43805	3947834	673	60680	0.309822	99.2815	0.408701	0.254165	99.3762	0.369595
UTEP20964	gularis	33.89	39407	3554151	235	21153	0.312012	99.6549	0.0330922	0.24892	99.2071	0.543984
UTEP21140	gularis	30.81	42380	3818987	496	44696	0.308752	99.4071	0.284142	0.249124	99.3865	0.364416
ANMO2211	guttatus	29.38	40560	3656140	901	81188	0.266049	99.4617	0.272208	0.218454	99.3759	0.405619
ANMO4407	guttatus	97.71	39924	3600658	262	23599	0.0847494	99.7458	0.169499	0.0992319	99.4886	0.412119
ANMO4408	guttatus	82.78	57970	5232912	241	21745	0.0827777	99.393	0.524258	0.0959504	99.2153	0.688775
ANMO4412	guttatus	56.54	40011	3607700	383	34517	0.121679	99.5973	0.281021	0.123098	99.4613	0.415556
ANMO4417	guttatus	80.27	40559	3658986	360	32436	0.0524109	99.7287	0.218893	0.0863081	99.4218	0.491912
ANMO922	guttatus	40.22	44608	4024054	693	62437	0.318721	99.4314	0.249852	0.27778	99.1869	0.535331
UOGV968	guttatus	36.37	40082	3614091	638	57549	0.31799	99.2615	0.420511	0.261532	99.3199	0.418584
UOGV970	guttatus	20.96	33376	3007998	777	70021	0.282772	99.423	0.294197	0.221942	99.4094	0.368651
ANMO4419	guttatus	20.06	32453	2923089	1048	94374	0.0572191	99.8262	0.116558	0.0518287	99.703	0.24522
EPR1222	guttatus	29.4	34567	3114224	748	67379	0.0549133	99.7655	0.179581	0.0666619	99.6775	0.255826
UOGV2668	guttatus	37.91	35193	3172781	314	28273	0.0954975	99.8019	0.102571	0.0878094	99.5597	0.35253
UOGV2669	guttatus	31.15	35846	3230174	631	56842	0.0633335	99.7484	0.188241	0.0877662	99.6005	0.311717
ANMO1031	guttatus	61.9	44676	4030872	392	35362	0.359143	99.1375	0.503365	0.279022	99.1624	0.558539
ANMO2959	guttatus	28.69	46246	4173770	838	75546	0.393138	99.2481	0.358722	0.309816	99.0639	0.626268
ANMO2961	guttatus	43.38	40606	3662431	363	32737	0.427651	99.1203	0.452088	0.30892	99.2066	0.484487
ANMO3459	guttatus	28.98	43317	3909263	656	59194	0.403757	99.0303	0.565936	0.306119	99.0036	0.690309
ANMO3460	guttatus	31.03	52954	4779501	765	68987	0.41747	99.1622	0.420369	0.318987	99.0395	0.641552
ANMO4520	guttatus	22.4	39774	3587587	906	81665	0.386947	99.2384	0.374702	0.303184	99.0923	0.604557
ANMO4533	guttatus	21.39	40207	3628187	958	86402	0.359945	99.1331	0.506933	0.310679	98.8982	0.791111
ANMO456	guttatus	42.29	43403	3914264	642	57889	0.404222	99.1864	0.409404	0.297859	99.2373	0.464864
ANMO4575	guttatus	33.37	43561	3931230	749	67568	0.414397	99.0735	0.512077	0.323995	99.0302	0.645778
ANMO4581	guttatus	59.22	47103	4253461	424	38277	0.384043	98.9602	0.655746	0.322208	98.9129	0.764907
ANMO4583	guttatus	28.86	42705	3854867	573	51720	0.348028	99.0101	0.641918	0.296949	98.9249	0.778107
ANMO4670	guttatus	50.04	47534	4289168	562	50657	0.396786	99.2558	0.347435	0.307053	99.1457	0.547239
ANMO883	guttatus	38.64	43938	3963912	706	63640	0.460402	99.1923	0.347266	0.311939	99.163	0.525012
ANMO909	guttatus	55.76	52992	4786118	372	33555	0.295038	99.255	0.450007	0.31886	98.8539	0.827268
ANMO911	guttatus	35.99	45214	4082198	592	53411	0.421262	99.0508	0.527981	0.315222	98.953	0.731763
ANMO952	guttatus	47.5	43873	3958465	554	49987	0.406106	99.0618	0.532138	0.303451	99.1403	0.556251
IDF172	guttatus	32.79	39329	3546002	965	86932	0.238117	99.5548	0.207058	0.214523	99.3692	0.416243
IDF58	guttatus	36.66	40529	3654118	733	66112	0.399322	99.1303	0.470414	0.278645	99.3193	0.40204
JAC22850	guttatus	29.2	44871	4047446	674	60786	0.355345	99.2169	0.42773	0.262487	99.215	0.522478
JAC23145	guttatus	31.13	39398	3554048	787	70961	0.287482	99.3024	0.410084	0.26958	99.2261	0.504298
JJWunnumb	guttatus	34.8	46600	4206070	716	64555	0.271087	99.3602	0.368678	0.224033	99.1719	0.604103
UOGV780	guttatus	43.16	44548	4022000	561	50587	0.223378	99.3477	0.428964	0.243685	99.0113	0.745027
UOGV786	guttatus	34.93	41599	3750711	738	66468	0.385148	99.4464	0.168502	0.290425	99.2785	0.431038
UOGV789	guttatus	43.99	46955	4234620	524	47211	0.398212	99.3518	0.249942	0.325507	99.1824	0.49211
UOGV1253	guttatus	41.11	36966	3331536	642	57831	0.0708962	99.7458	0.183293	0.0907089	99.6103	0.298961
UOGV231	guttatus	38.78	39344	3547043	691	62262	0.0674569	99.6932	0.239311	0.0875377	99.532	0.380486
APG281	inornatus	24.31	40192	3623847	760	68456	0.337443	99.477	0.185521	0.273659	99.2224	0.50394
APG297	inornatus	22.58	37681	3396627	487	43866	0.216569	99.5942	0.189213	0.204173	99.3102	0.485599
LACM137194	inornatus	35.31	42785	3858984	412	37139	0.366192	99.273	0.360807	0.268361	99.1914	0.540194
UTEP21089	inornatus	41.59	45118	4066468	573	51674	0.32318	99.2143	0.462515	0.289219	99.3513	0.359501
UTEP21143	inornatus	35.8	43814	3952588	818	73710	0.299824	99.4261	0.274047	0.274023	99.1916	0.534359
ANMO4911	inornatus	43.57	41289	3721588	439	39559	0.275538	99.4363	0.288177	0.241913	99.4032	0.354902
ANMO4912	inornatus	93.84	46384	4186283	296	26685	0.206108	99.4491	0.344763	0.279436	99.1323	0.588302
ANMO4913	inornatus	58.44	43576	3930664	350	31543	0.250452	99.4325	0.317028	0.261254	99.2433	0.495438
ANMO4916	inornatus	80.56	45517	4106615	425	38291	0.268993	99.4803	0.250712	0.279232	99.2065	0.514219
ANMO4917	inornatus	100.15	45867	4138527	348	31344	0.287136	99.5278	0.185043	0.284981	99.1871	0.527966
ANMO4918	inornatus	26.3	35942	3240771	473	42623	0.302653	99.4017	0.295615	0.267591	99.216	0.516389
ANMO4928	inornatus	63.98	43200	3897094	446	40193	0.253776	99.4477	0.298559	0.226117	99.2729	0.500989
ANMO4929	inornatus	90.89	47193	4259790	380	34245	0.236531	99.4919	0.271572	0.251749	99.1541	0.594114
ANMO4930	inornatus	58.58	44729	4034904	198	17837	0.313954	99.4674	0.218647	0.324047	99.1497	0.526258
ANMO4931	inornatus	91.33	46790	4222278	417	37573	0.375269	99.3666	0.258164	0.31843	99.1279	0.553635
ANMO4932	inornatus	27.91	38214	3444362	509	45881	0.34001	99.2895	0.370524	0.286294	99.3179	0.395806
ANMO4941	inornatus	89.44	43386	3914543	227	20454	0.312897	99.4035	0.283563	0.25906	99.2334	0.507492
ANMO4951	inornatus	64.9	45289	4088677	306	27598	0.257265	99.3007	0.442061	0.295646	99.0663	0.638079
ANMO4952	inornatus	56.11	43593	3934499	320	28840	0.253121	99.4313	0.315534	0.294472	99.1144	0.591079
ANMO4953	inornatus	71.61	47232	4265560	469	42281	0.257799	99.3756	0.366595	0.308213	99.0106	0.681177
ANMO4954	inornatus	66.39	38493	3469877	200	18026	0.27183	99.4064	0.321757	0.240268	99.3842	0.375575
ANMO4962	inornatus	71.78	48117	4345098	247	22255	0.247135	99.5057	0.247135	0.320085	99.0036	0.676279
ANMO4963	inornatus	102.63	49964	4516530	318	28679	0.313818	99.3026	0.383556	0.262591	98.9493	0.788105
ANMO4964	inornatus	43.51	42351	3820642	299	26931	0.245071	99.5841	0.170807	0.231532	99.2216	0.546871
ANMO1507	inornatus	48.99	40309	3635492	576	51886	0.298732	99.5047	0.196585	0.259195	99.2702	0.470583
RCT957	inornatus	20.71	39754	3585877	897	80827	0.268475	99.468	0.263526	0.221452	99.1986	0.579942
CPA013	inornatus	81.97	48639	4396077	371	33434	0.290124	99.4227	0.287133	0.255751	99.0039	0.740387
CPA014	inornatus	90.53	46164	4161284	283	25483	0.266845	99.6076	0.125574	0.262419	99.3826	0.354987
ANMO489	lineattissimus	22.84	32819	3124845	493	46920	0.21526	99.3968	0.387894	0.162216	99.2033	0.634495
ANMO1185	lineattissimus	45.16	41506	3951672	598	56873	0.0615406	99.7064	0.232096	0.0800927	99.454	0.465879
ANMO1186	lineattissimus	34.45	36599	3481908	808	76800	0.0546875	99.8333	0.111979	0.0703063	99.6066	0.323127
JAC23652	lineattissimus	25.97	38810	3692274	728	69209	0.106923	99.737	0.156049	0.0964175	99.5299	0.373645
ANMO1112	lineattissimus	55.37	39657	3775916	424	40312	0.324965	99.484	0.19101	0.257342	99.2538	0.488862
ANMO11388	lineattissimus	23.8	37123	3532732	1062	100989	0.298052	99.4712	0.230718	0.256657	99.3038	0.439518
ANMO478	lineattissimus	38.57	38269	3643261	449	42715	0.38394	99.307	0.309025	0.25683	99.2512	0.491922
ANMO4925	marmoratus	87.68	46032	4153549	176	15864	0.189107	99.502	0.308875	0.218993	99.2218	0.559209
ANMO4926	marmoratus	40.61	39881	3593846	378	34042	0.196816	99.6563	0.146877	0.179362	99.5036	0.317014
ANMO4927	marmoratus	82.88	43956	3965012	222	19992	0.140056	99.7049	0.155062	0.175157	99.3692	0.45561
ANMO4939	marmoratus	57.13	42158	3800766	317	28540	0.252278	99.6671	0.0805886	0.221982	99.4042	0.373846
ANMO4942	marmoratus	84.24	44626	4025447	348	31344	0.226519	99.5852	0.188234	0.22328	99.3096	0.467079
ANMO4944	marmoratus	21.38	25278	2277379	488	43951	0.204773	99.6314	0.163819	0.170503	99.5025	0.326999
ANMO4945	marmoratus	113.07	44437	4009586	172	15487	0.200168	99.703	0.0968554	0.243367	99.2076	0.548984
APG282	marmoratus	34.22	38680	3486741	210	18921	0.18498	99.5613	0.253686	0.202625	99.3756	0.421741
E38	marmoratus	102.79	44459	4013198	264	23774	0.311264	99.5457	0.143013	0.237616	99.1943	0.568101
LACM135981	marmoratus	27.27	35698	3216993	694	62530	0.179114	99.5858	0.235087	0.17019	99.4713	0.358502
RCT925	marmoratus	28.31	40422	3644475	792	71331	0.175239	99.6579	0.166828	0.155825	99.4201	0.424094
RCT926	marmoratus	161.09	62220	5621991	71	6398	0.125039	99.5936	0.281338	0.203931	98.9433	0.852776
RCT954	marmoratus	26.77	39328	3545179	753	67820	0.202005	99.6329	0.165143	0.165831	99.4302	0.403957
ANMO3783	occidentalis	40.82	41242	3718574	497	44796	0.346013	99.3057	0.348245	0.261955	99.2928	0.445278
ANMO4092	occidentalis	45.64	43882	3957121	524	47227	0.440426	99.2398	0.319732	0.297565	99.2406	0.461826
CUC37-3	occidentalis	68.87	56204	5073608	363	32717	0.241465	99.4529	0.305651	0.201435	99.1691	0.629493
ANMO4769	occidentalis	24.92	40490	3650249	919	82762	0.149827	99.7064	0.143786	0.143908	99.4366	0.419478
ISZ664	occidentalis	52.47	41776	3767398	455	40994	0.334195	99.4267	0.239059	0.254605	99.2944	0.450974
ANMO2155	sackii	31.08	36534	3292533	650	58553	0.251055	99.5594	0.189572	0.202246	99.4458	0.351918
ANMO3801	sackii	60.11	40386	3642668	363	32702	0.299676	99.4954	0.20488	0.277654	99.2396	0.482751
ISZ329	sackii	27.93	38368	3458779	623	56141	0.309934	99.4104	0.279653	0.257201	99.3134	0.429429
LACM130569	sackii	39.73	41529	3744677	636	57320	0.314027	99.3911	0.294836	0.263307	99.2984	0.438249
LACM130560	sackii	76.48	43508	3927064	457	41200	0.223301	99.4272	0.349515	0.244203	99.1428	0.613002
LACM130562	sackii	43.96	39051	3521323	548	49368	0.281559	99.4875	0.230919	0.229147	99.3316	0.439295
ANMO4467	sackii	24.68	37640	3392101	895	80630	0.224482	99.5448	0.230683	0.202795	99.4334	0.363845
AMNH104633	scalaris	117.43	75082	6783423	90	8104	0.0740375	99.8149	0.111056	0.253987	98.9104	0.83564
ANMO1325	scalaris	23.39	38103	3435450	1023	92235	0.188649	99.4135	0.397897	0.180559	99.3458	0.473679
ANMO1377	scalaris	35.78	43999	3968200	876	78936	0.247036	99.4793	0.273639	0.239781	99.2743	0.485938
ANMO1529	scalaris	28.59	42207	3806094	956	86151	0.279741	99.4359	0.284384	0.244319	99.2735	0.482227
ANMO1531	scalaris	24.64	41693	3759321	1106	99711	0.277803	99.3381	0.38411	0.241054	99.2882	0.470697
ANMO1558	scalaris	50.89	46102	4159206	509	45857	0.303116	99.4745	0.222431	0.273153	99.1712	0.555683
ANMO1570	scalaris	34.19	40434	3644608	417	37578	0.236841	99.4891	0.274097	0.173105	99.4366	0.390248
ANMO1897	scalaris	25.8	39592	3572408	877	79120	0.336198	99.0445	0.619312	0.296831	98.9606	0.74258
ANMO2609	scalaris	35.06	36377	3279003	568	51173	0.195416	99.5838	0.22082	0.194571	99.4183	0.38713
ANMO4750	scalaris	42.79	40699	3671176	229	20635	0.290768	99.4378	0.271384	0.229382	99.2735	0.497143
ANMO4751	scalaris	22.86	29030	2617545	484	43639	0.247485	99.3836	0.368936	0.210044	99.3143	0.475637
ANMO4753	scalaris	107.62	46827	4228866	298	26851	0.186213	99.5643	0.249525	0.237416	99.1111	0.651475
ANMO4771	scalaris	52.58	45947	4146685	613	55225	0.235401	99.5364	0.228158	0.19278	99.2603	0.546871
ANMO4772	scalaris	102.82	45702	4128357	275	24777	0.153368	99.5964	0.250232	0.201024	99.1337	0.665325
ANMO4774	scalaris	30.19	41438	3737219	896	80705	0.204448	99.6159	0.179667	0.191881	99.3455	0.462643
ANMO4784	scalaris	35.61	40809	3680822	677	60985	0.213167	99.5769	0.209888	0.183872	99.3339	0.482229
ANMO4786	scalaris	54.59	45319	4090728	688	61971	0.206548	99.6047	0.188798	0.193951	99.2388	0.567234
ANMO4901	scalaris	60.24	42097	3796514	358	32275	0.238575	99.3679	0.393493	0.243091	99.3236	0.433292
ANMO4902	scalaris	36.86	41203	3713497	368	33156	0.280492	99.4752	0.2443	0.221597	99.4303	0.348082
ANMO4947	scalaris	59.52	40972	3693673	324	29188	0.215842	99.5683	0.215842	0.220404	99.3981	0.381463
ANMO4949	scalaris	26.59	64314	5801809	918	82769	0.480856	99.06	0.459109	0.467906	98.9018	0.630252
ANMO4957	scalaris	85.03	48287	4364489	328	29554	0.175949	99.5635	0.26054	0.227129	99.0291	0.743776
ANMO4958	scalaris	73.81	54825	4951301	332	29947	0.203693	99.3689	0.427422	0.253772	99.0331	0.713126
ANMO4959	scalaris	37.18	45182	4078523	749	67486	0.278576	99.4606	0.260795	0.329482	99.0485	0.622014
ANMO4966	scalaris	59.3	52331	4724679	434	39110	0.265917	99.4656	0.268474	0.263319	99.0801	0.656616
DHL409	scalaris	88.54	53944	4871699	177	15959	0.288239	99.3233	0.388496	0.264959	98.9275	0.807542
CPA002	scalaris	23.47	38304	3452387	985	88767	0.262485	99.43	0.307547	0.21278	99.39	0.397261
CPA015	scalaris	29.48	40771	3677020	859	77430	0.2428	99.4253	0.331913	0.227739	99.2692	0.503098
CPA027	scalaris	24.84	38841	3499991	1047	94305	0.183447	99.6236	0.192991	0.165572	99.5067	0.327744
CPA038	scalaris	22.91	47364	4271669	1010	90988	0.252781	99.5175	0.229701	0.214857	99.2378	0.547304
CPA039	scalaris	39.03	48603	4384604	674	60743	0.258466	99.4386	0.302916	0.232678	99.2028	0.564498
CPA048	scalaris	36.26	56130	5063924	741	66811	0.231998	99.3773	0.390654	0.20727	99.2281	0.564582
CPA056	scalaris	24.19	39134	3526793	998	89895	0.21247	99.594	0.193559	0.1866	99.4557	0.357719
CPA105	scalaris	28.14	35583	3207118	443	39920	0.260521	99.4489	0.290581	0.218171	99.3442	0.43762
CPA28	scalaris	20.14	34380	3097528	985	88724	0.138632	99.6607	0.200622	0.143146	99.508	0.348827
CPA57	scalaris	21.44	33654	3032635	592	53357	0.279251	99.3965	0.324231	0.197056	99.3798	0.423097
DHL384	scalaris	71.81	48052	4338193	307	27675	0.267389	99.4038	0.328817	0.273178	99.0104	0.716404
DHL431	scalaris	40.34	47453	4280085	596	53698	0.23837	99.5177	0.243957	0.24329	99.2392	0.517466
ANMO1453	scalaris	74.03	50717	4577952	241	21720	0.184162	99.5396	0.276243	0.254874	99.0591	0.686049
ANMO1466	scalaris	43.4	45802	4130871	802	72253	0.365383	99.4049	0.229748	0.289939	99.2348	0.475227
UOGV2131	scalaris	48.98	46384	4184950	604	54455	0.29933	99.3058	0.394821	0.252404	99.1778	0.569804
CPA001	scalaris	62.5	44116	3980199	494	44546	0.264895	99.3153	0.419791	0.250264	99.1966	0.553088
CPA034	scalaris	51.73	47688	4303002	490	44156	0.294411	99.4202	0.285352	0.255473	99.1445	0.600046
CPA047	scalaris	57.92	53818	4857401	392	35348	0.158425	99.4455	0.396062	0.211162	99.1367	0.652139
JCGZ049	scalaris	27.6	39584	3567585	735	66209	0.191817	99.5937	0.214472	0.174936	99.4651	0.359963
SFDG040	scalaris	25.15	41144	3710820	1086	97928	0.276734	99.3036	0.419696	0.237117	99.2355	0.527431
ANMO1579	scalaris	55.64	51913	4683724	431	38819	0.208661	99.6445	0.146835	0.203364	99.2003	0.596384
ANMO1580	scalaris	25.24	52050	4693117	954	86035	0.181322	99.4154	0.403324	0.174298	99.3399	0.485797
ANMO1585	scalaris	38.61	47260	4262484	649	58480	0.170999	99.5793	0.249658	0.191203	99.3046	0.50419
ANMO1607	scalaris	62.01	43852	3955374	472	42509	0.21172	99.6283	0.159966	0.197756	99.3226	0.479677
ANMO1609	scalaris	44.05	43656	3937491	788	70972	0.219805	99.6125	0.167672	0.222324	99.2947	0.482998
ANMO4260	scalaris	20.94	35378	3189313	870	78417	0.257597	99.3968	0.345588	0.230677	99.2525	0.516788
CPA072	scalaris	68.04	49977	4510370	409	36853	0.195371	99.5604	0.244213	0.220448	99.1518	0.627753
AUHT6145	scalaris	23.4	37132	3345187	625	56285	0.158124	99.7033	0.13858	0.147974	99.4775	0.374538
AUHT6146	scalaris	20.06	25739	2318569	376	33870	0.156481	99.6221	0.221435	0.120678	99.5595	0.319852
AUHT6147	scalaris	51	34719	3128200	159	14317	0.167633	99.7276	0.104771	0.160028	99.5639	0.276101
AUHT6148	scalaris	101.76	51167	4617609	219	19726	0.152084	99.6705	0.177431	0.17574	99.2435	0.580733
SFDG144	scalaris	21.78	37167	3348720	1114	100365	0.14248	99.6254	0.232153	0.134768	99.5502	0.315046
UOGV1978	scalaris	44.48	42663	3848470	760	68429	0.0847594	99.8203	0.094989	0.0865279	99.4602	0.453271
UOGV2071	scalaris	29.35	42835	3862897	1135	102272	0.252268	99.4769	0.270846	0.249916	99.2764	0.473686
CAS210988	sexlineatus	31.59	40512	3652633	768	69220	0.342387	99.3311	0.326495	0.275774	99.2871	0.437109
LSUH21201	sexlineatus	147.73	54010	4876329	109	9817	0.25466	99.5925	0.152796	0.237043	99.0852	0.677805
LSUH18938	sexlineatus	30.59	39381	3549430	768	69174	0.151791	99.6675	0.180704	0.137966	99.5061	0.355973
UTEP19952	sexlineatus	24.6	40752	3675486	807	72674	0.183009	99.6753	0.141729	0.157231	99.3422	0.500532
UTEP20927	sexlineatus	20	42766	3855164	1121	100969	0.242649	99.5712	0.186196	0.185595	99.3243	0.49007
AMNH104629	sexlineatus	55.02	46163	4161711	508	45744	0.33447	99.5322	0.133351	0.329384	99.2682	0.402407
OCGR12740	sexlineatus	30.69	39474	3558558	908	81806	0.24937	99.5147	0.235924	0.216829	99.3768	0.406344
OCGR7048	sexlineatus	21.26	34171	3078957	510	45965	0.17187	99.5083	0.319809	0.16944	99.4222	0.40832
UTEP21736	sexlineatus	63.6	45207	4074579	345	31071	0.241383	99.6106	0.148048	0.201272	99.461	0.337728
UOGV2566	tigris	55.27	43671	3939471	499	44981	0.546898	99.113	0.340144	0.400612	99.0734	0.525984
LACM274	tigris	44.19	51517	4645822	607	54681	0.488287	99.2886	0.223112	0.376532	99.1348	0.488697
OCGR8538	tigris	30.76	41078	3703247	811	73052	0.336746	99.4607	0.202595	0.273085	99.3033	0.423655
RCT902	tigris	131.85	65107	5883969	161	14519	0.158413	99.4008	0.440802	0.380916	98.6913	0.927741
LACM135843	tigris	27.75	44223	3986841	683	61519	0.299095	99.5026	0.198313	0.286944	99.2467	0.466359
LACM185973	tigris	40.62	45741	4124410	579	52175	0.31816	99.4039	0.277911	0.285956	99.2719	0.4421
LACM186642	tigris	60.98	50641	4566085	461	41520	0.423892	99.4027	0.17341	0.326012	99.2496	0.424368
LACM187001	tigris	59.81	48560	4380706	522	47030	0.403997	99.3536	0.242398	0.348095	99.1396	0.512315
LACM189963	tigris	78.9	47443	4276795	411	37046	0.323922	99.3279	0.348216	0.292626	99.341	0.366396
LACM2696	tigris	54.35	52619	4745292	541	48720	0.314039	99.5341	0.151888	0.283228	99.2554	0.461405
LACM3476	tigris	53.36	42204	3808074	354	31901	0.347951	99.3731	0.278988	0.301202	99.1796	0.519213
LACM4096	tigris	42.64	49530	4466377	641	57756	0.431124	99.3196	0.249325	0.315916	99.2036	0.480434
LACM4130	tigris	54.38	50320	4539663	665	59929	0.398805	99.3042	0.297018	0.314098	99.1542	0.531669
LACM4852	tigris	45.81	41642	3755491	242	21812	0.348432	99.3169	0.334678	0.296073	99.2335	0.470378
